# Supplementary material for: Combination of a Deep Eutectic Solvent and Macroporous Resin for Green Recovery of Iridoids, Chlorogenic Acid, and Flavonoids from Eucommia ulmoides Leaves
Source: MDPI journal article supplement (doi:10.3390/molecules29030737), 2024-02-05
Supplement: s1 [file s1]

## Supplementary Materials

### Combination of a Deep Eutectic Solvent and Macroporous Resin for Green Recovery of Iridoids, Chlorogenic Acid, and Flavonoids from *Eucommia ulmoides* Leaves

Yunhui Liao <sup>1,2</sup>, Feng Chen <sup>1</sup>, Haishan Tang <sup>1,3</sup>, Wubliker Dessie <sup>1,2</sup> and Zuodong Qin <sup>1,2,\*</sup>

<sup>1</sup> College of Chemistry and Bioengineering, Hunan University of Science and Engineering, Yongzhou 425199, China; liaoyunhui@huse.edu.cn (Y.L.); chenfeng1157354@163.com (F.C.); thshappy@163.com (H.T.); dwubliker@yahoo.com (W.D.)

<sup>2</sup> Hunan Engineering Technology Research Center for Comprehensive Development and Utilization of Biomass Resources, College of Chemistry and Bioengineering, Hunan University of Science and Engineering, Yongzhou 425199, China

<sup>3</sup> Hunan Provincial Key Laboratory for Comprehensive Utilization of Dominant Plant Resources in Southern Hunan, Yongzhou 425199, China

\* Correspondence: dong6758068@163.com

## 1. Thermal properties of DESs

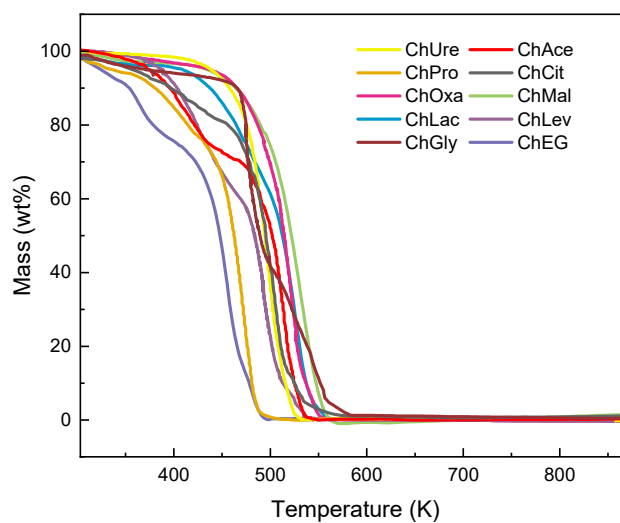

**Figure S1.** The DTA curves of 10 kinds of DESs

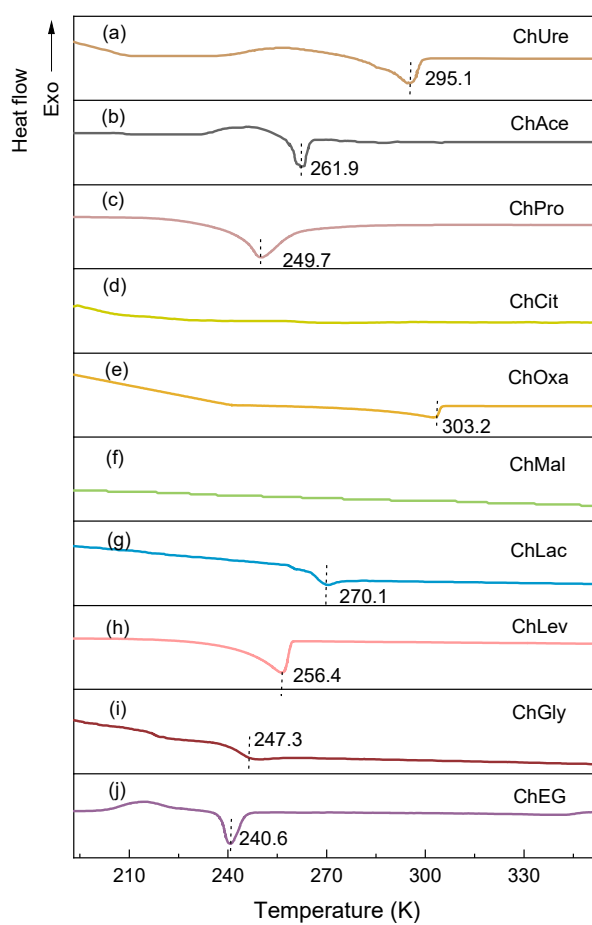

**Figure S2.** The DSC curves of 10 kinds of DESs

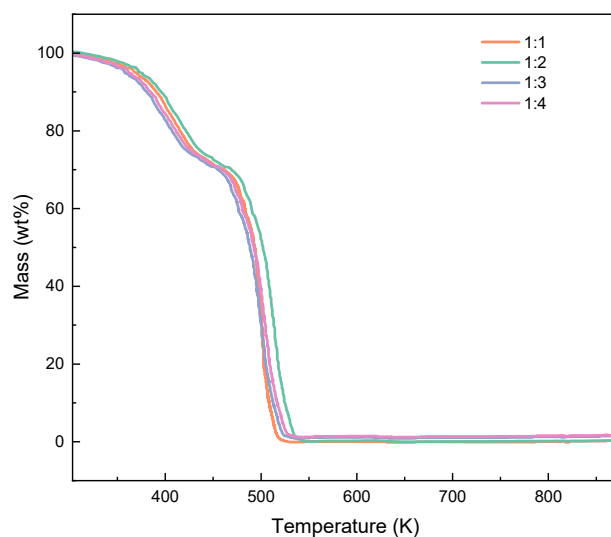

**Figure S3.** The DTA curves of ChAce with HBA-HBD molar ratio of 1:1, 1:2, 1:3, and 1:4.

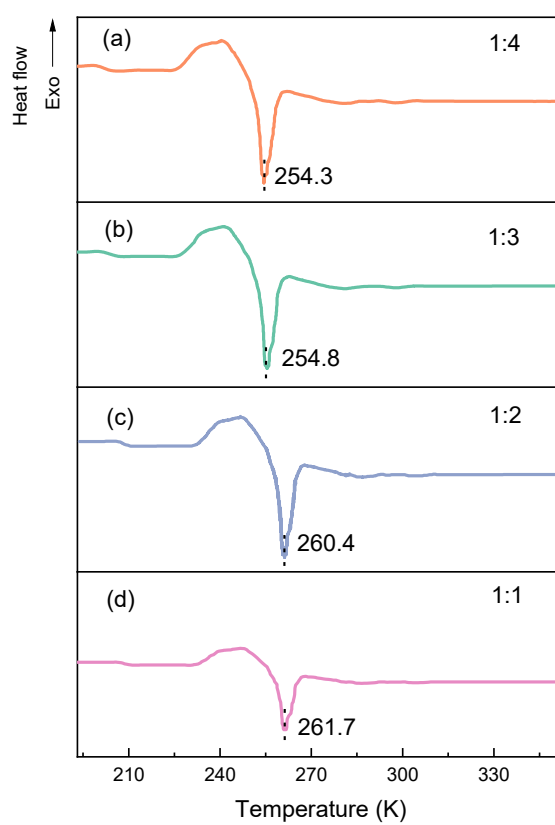

**Figure S4.** The DSC curves of ChAce with HBA-HBD molar ratio of 1:1, 1:2, 1:3, and 1:4.

## 2. Response surface methodology (RSM)

**Table S1.** ANOVA analysis results of the quadratic model.

| Source             | CGA     |          | GPA     |          | AU      |          | GP      |          | RU       |          | IQU     |          |
|--------------------|---------|----------|---------|----------|---------|----------|---------|----------|----------|----------|---------|----------|
|                    | F-value | P-value  | F-value | P-value  | F-value | P-value  | F-value | P-value  | F-value  | P-value  | F-value | P-value  |
| Model              | 320.26  | < 0.0001 | 382.08  | < 0.0001 | 512.64  | < 0.0001 | 55.44   | < 0.0001 | 186.09   | < 0.0001 | 371.94  | < 0.0001 |
| A                  | 13.29   | 0.0012   | 79.84   | < 0.0001 | 173.98  | < 0.0001 | 22.68   | < 0.0001 | 180.11   | < 0.0001 | 249.93  | < 0.0001 |
| B                  | 28.02   | < 0.0001 | 273.18  | < 0.0001 | 100.78  | < 0.0001 | 15.93   | 0.0005   | 43.35    | < 0.0001 | 27.77   | < 0.0001 |
| C                  | 22.07   | < 0.0001 | 97.70   | < 0.0001 | 81.70   | < 0.0001 | 5.27    | 0.0304   | 1.79     | 0.1931   | 37.37   | < 0.0001 |
| D                  | 22.07   | < 0.0001 | 2.70    | 0.1128   | 19.66   | 0.0002   | 31.38   | < 0.0001 | 133.19   | < 0.0001 | 111.08  | < 0.0001 |
| E                  | 161.93  | < 0.0001 | 457.51  | < 0.0001 | 375.57  | < 0.0001 | 38.89   | < 0.0001 | 185.73   | < 0.0001 | 115.57  | < 0.0001 |
| AB                 | 35.51   | < 0.0001 | 0.2143  | 0.6474   | 3.85    | 0.0609   | 4.51    | 0.0437   | 4.23     | 0.0502   | 34.83   | < 0.0001 |
| AC                 | 0.0197  | 0.8896   | 23.63   | < 0.0001 | 123.95  | < 0.0001 | 7.33    | 0.0121   | 28.62    | < 0.0001 | 45.50   | < 0.0001 |
| AD                 | 104.78  | < 0.0001 | 91.85   | < 0.0001 | 20.51   | 0.0001   | 1.44    | 0.2417   | 4.23     | 0.0502   | 149.47  | < 0.0001 |
| AE                 | 14.87   | 0.0007   | 60.50   | < 0.0001 | 64.01   | < 0.0001 | 9.09    | 0.0058   | 1.06     | 0.3134   | 34.83   | < 0.0001 |
| BC                 | 17.11   | 0.0003   | 2.78    | 0.1081   | 133.37  | < 0.0001 | 0.8558  | 0.3637   | 1.06     | 0.3134   | 129.56  | < 0.0001 |
| BD                 | 21.41   | < 0.0001 | 21.01   | 0.0001   | 4.15    | 0.0523   | 0.0188  | 0.8921   | 5.12     | 0.0325   | 21.50   | < 0.0001 |
| BE                 | 3.07    | 0.0919   | 51.50   | < 0.0001 | 0.0057  | 0.9404   | 0.0188  | 0.8921   | 2.71     | 0.1123   | 8.71    | 0.0068   |
| CD                 | 90.92   | < 0.0001 | 214.04  | < 0.0001 | 60.44   | < 0.0001 | 41.49   | < 0.0001 | 138.10   | < 0.0001 | 344.08  | < 0.0001 |
| CE                 | 240.08  | < 0.0001 | 67.91   | < 0.0001 | 33.78   | < 0.0001 | 10.37   | 0.0035   | 6.10     | 0.0207   | 57.58   | < 0.0001 |
| DE                 | 8.67    | 0.0069   | 2.06    | 0.1636   | 0.2407  | 0.6280   | 0.3804  | 0.5430   | 2.07     | 0.1622   | 0.7109  | 0.4071   |
| A <sup>2</sup>     | 2812.31 | < 0.0001 | 5243.96 | < 0.0001 | 8606.32 | < 0.0001 | 771.79  | < 0.0001 | 11330.15 | < 0.0001 | 4706.17 | < 0.0001 |
| B <sup>2</sup>     | 1011.33 | < 0.0001 | 1099.69 | < 0.0001 | 1178.56 | < 0.0001 | 221.28  | < 0.0001 | 1240.26  | < 0.0001 | 488.68  | < 0.0001 |
| C <sup>2</sup>     | 1035.63 | < 0.0001 | 322.46  | < 0.0001 | 120.40  | < 0.0001 | 101.35  | < 0.0001 | 183.13   | < 0.0001 | 202.17  | < 0.0001 |
| D <sup>2</sup>     | 2596.93 | < 0.0001 | 1609.15 | < 0.0001 | 908.97  | < 0.0001 | 287.89  | < 0.0001 | 1100.59  | < 0.0001 | 1963.91 | < 0.0001 |
| E <sup>2</sup>     | 3217.71 | < 0.0001 | 1715.08 | < 0.0001 | 882.28  | < 0.0001 | 211.84  | < 0.0001 | 1204.05  | < 0.0001 | 1909.10 | < 0.0001 |
| Lack of Fit        | 0.2562  | 0.9876   | 0.1061  | 0.9999   | 2.30    | 0.1805   | 0.3717  | 0.9487   | 0.9033   | 0.6122   | 2.39    | 0.1699   |
| R <sup>2</sup>     | 0.9930  |          | 0.9941  |          | 0.9956  |          | 0.9603  |          | 0.9742   |          | 0.9940  |          |
| Adj-R <sup>2</sup> | 0.9894  |          | 0.9928  |          | 0.9909  |          | 0.9345  |          | 0.9507   |          | 0.9874  |          |

**Table S2.** Model equations with coded factors for the amounts of 6 target components.

| Model             | Equation                                                                                                                                                                                                                         |
|-------------------|----------------------------------------------------------------------------------------------------------------------------------------------------------------------------------------------------------------------------------|
| CGA amount (mg/g) | = 43.1-0.65A+0.944B-0.838C-0.838D-2.269E-2.125AB-0.050AC-3.65AD+1.375AE-1.475BC+1.65BD+0.625BE+3.4CD-5.525CE+1.05DE-12.802A <sup>2</sup> -7.677B <sup>2</sup> -7.769C <sup>2</sup> -12.302D <sup>2</sup> -13.694E <sup>2</sup>   |
| GPA amount (mg/g) | =136.133-2.413A-4.463B-2.669C-0.444D-5.775E-0.250AB-2.625AC-5.175AD+4.2AE+0.9BC+2.475BD-3.875BE+7.9CD-4.45CE+0.775DE-26.473A <sup>2</sup> -12.123B <sup>2</sup> -6.565C <sup>2</sup> -14.665D <sup>2</sup> -15.140E <sup>2</sup> |

|                   |                                                                                                                                                                       |
|-------------------|-----------------------------------------------------------------------------------------------------------------------------------------------------------------------|
| AU amount (mg/g)  | $=155.35-4.369A-3.325B-2.994C-1.469D-6.419E-1.3AB-7.375AC-3AD+5.3AE+7.65BC+1.35BD+0.050BE+5.15CD-3.85CE-0.325DE-41.604A^2-15.396B^2-4.921C^2-13.521D^2-13.321E^2$     |
| GP amount (mg/g)  | $=5.448-0.174A-0.146B-0.084C-0.204D-0.228E-0.155AB-0.198AC-0.088AD+0.22AE-0.068BC+0.01BD+0.010BE+0.47CD-0.235CE+0.045DE-1.372A^2-0.735B^2-0.497C^2-0.838D^2-0.719E^2$ |
| RU amount (mg/g)  | $=13.4-0.544A-0.4B-0.081C-0.35D-0.563E-0.25AB-0.65AC+0.25AD+0.125AE+0.125BC-0.275BD-0.2BE+0.75CD-0.3CE+0.175DE-3A^2-1.275B^2-0.75C^2-0.825D^2-1.175E^2$               |
| IQU amount (mg/g) | $=12.833-0.469A-0.156B-0.181C-0.313D-0.319E-0.35AB-0.4AC-0.725AD+0.35AE+0.675BC-0.275BD-0.175BE+1.1CD-0.45CE+0.05DE-2.754A^2-0.888B^2-0.571C^2-1.779D^2-1.754E^2$     |

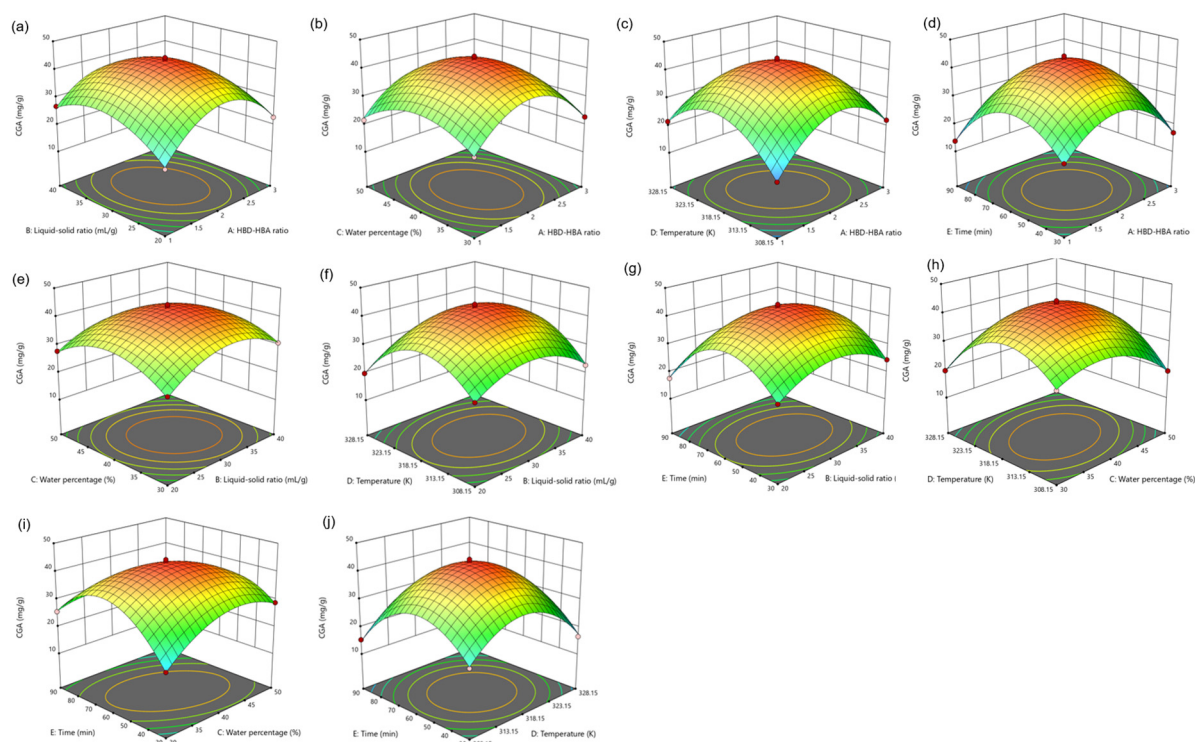

**Figure S5.** Response surface for the interactions of independent variables on CGA amount (a: HBD-HBA ratio and liquid-solid ratio; b: HBD-HBA ratio and water percentage; c: HBD-HBA ratio and temperature; d: HBD-HBA ratio and time; e: Liquid-solid ratio and water percentage; f: Liquid-solid ratio and temperature; g: Liquid-solid ratio and time; h: Water percentage and temperature; i: Water percentage and time; j: Temperature and time).

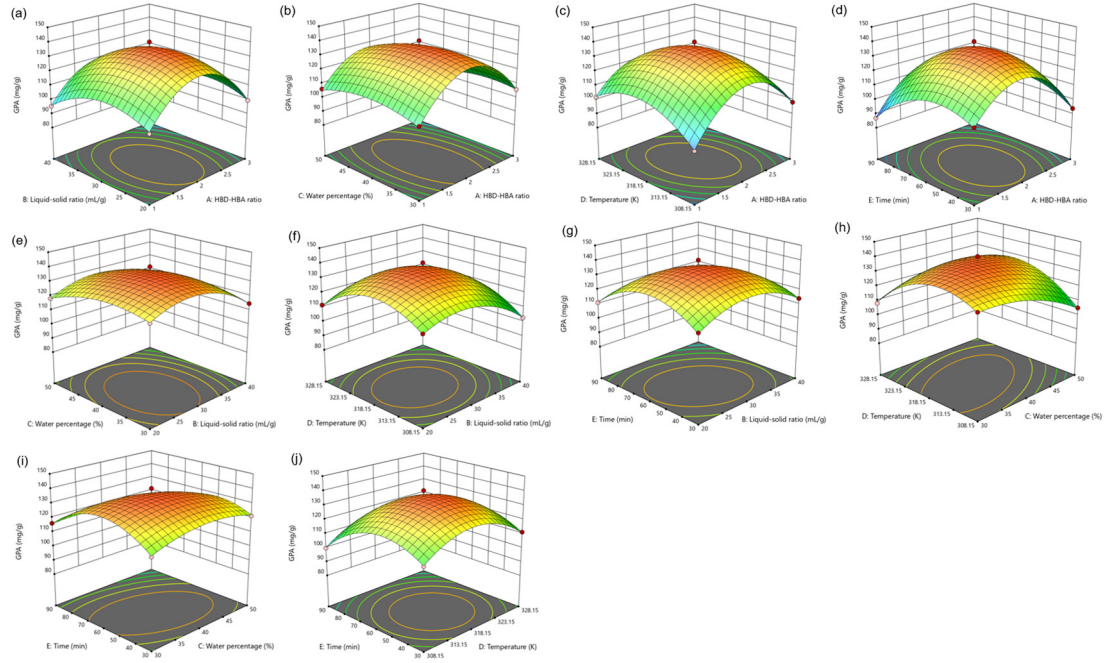

**Figure S6.** Response surface for the interactions of independent variables on GPA amount (a: HBD-HBA ratio and liquid-solid ratio; b: HBD-HBA ratio and water percentage; c: HBD-HBA ratio and temperature; d: HBD-HBA ratio and time; e: Liquid-solid ratio and water percentage; f: Liquid-solid ratio and temperature; g: Liquid-solid ratio and time; h: Water percentage and temperature; i: Water percentage and time; j: Temperature and time).

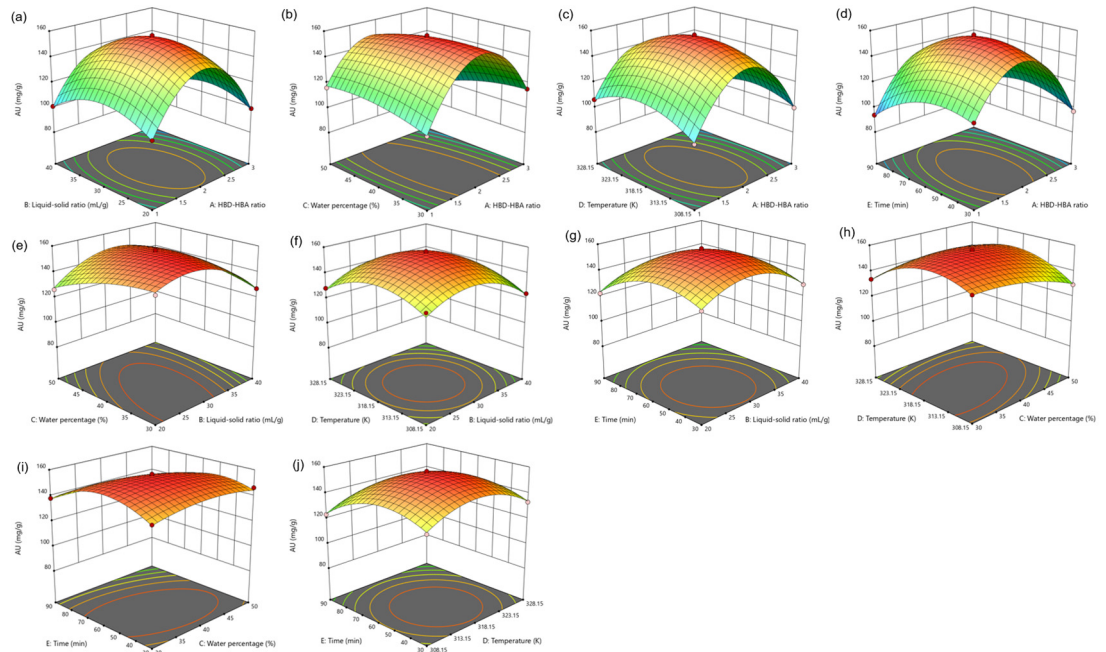

**Figure S7.** Response surface for the interactions of independent variables on AU amount (a: HBD-HBA ratio and liquid-solid ratio; b: HBD-HBA ratio and water percentage; c: HBD-HBA ratio and temperature; d: HBD-HBA ratio and time; e: Liquid-solid ratio and water percentage; f: Liquid-solid ratio and temperature; g: Liquid-solid ratio and time; h: Water percentage and temperature; i: Water percentage and time; j: Temperature and time).

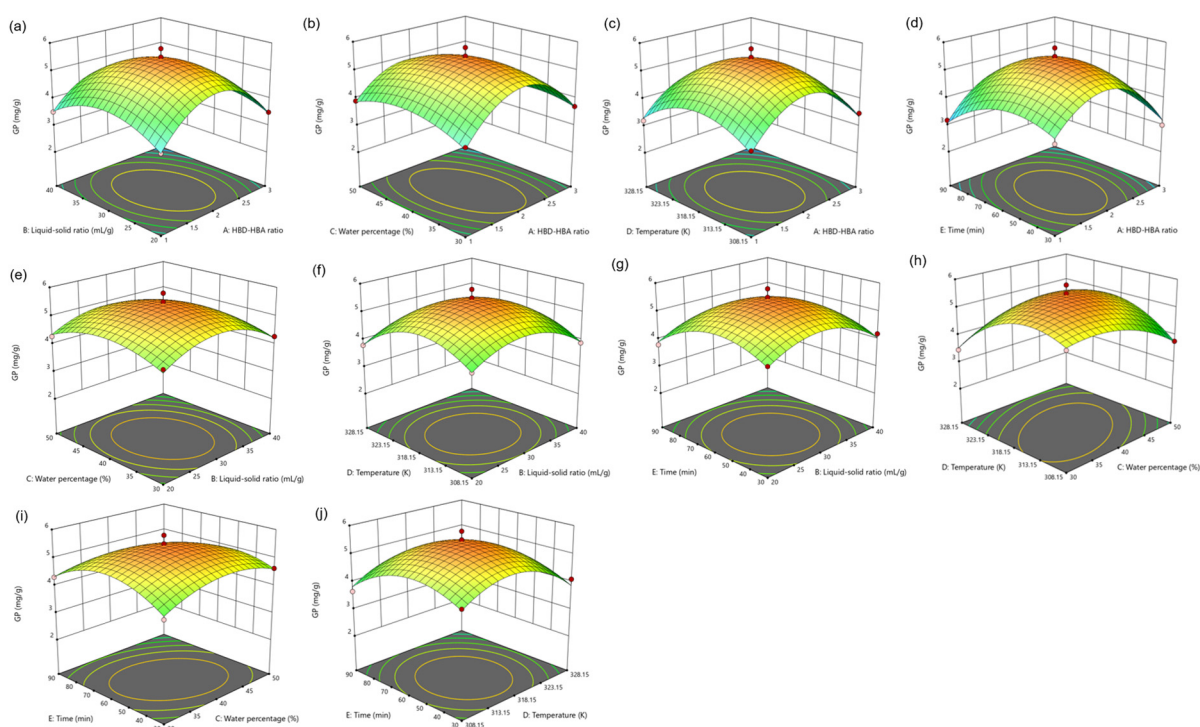

**Figure S8.** Response surface for the interactions of independent variables on GP amount (a: HBD-HBA ratio and liquid-solid ratio; b: HBD-HBA ratio and water percentage; c: HBD-HBA ratio and temperature; d: HBD-HBA ratio and time; e: Liquid-solid ratio and water percentage; f: Liquid-solid ratio and temperature; g: Liquid-solid ratio and time; h: Water percentage and temperature; i: Water percentage and time; j: Temperature and time).



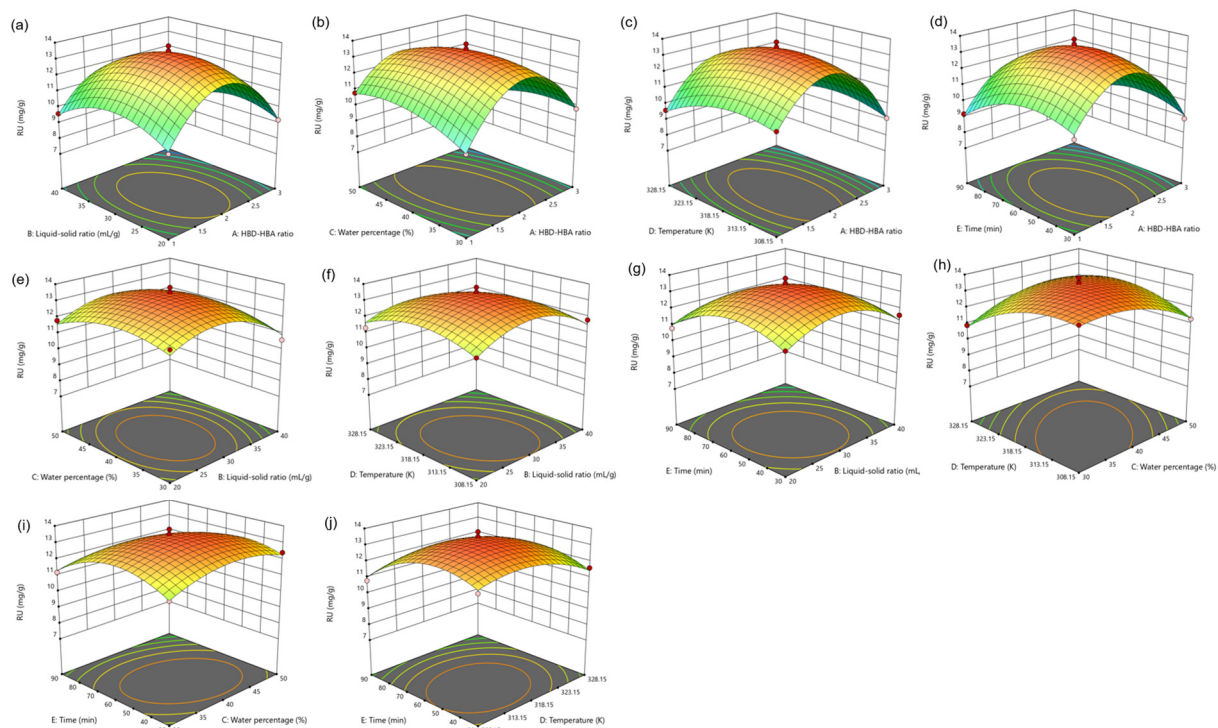

**Figure S9.** Response surface for the interactions of independent variables on RU amount (a: HBD-HBA ratio and liquid-solid ratio; b: HBD-HBA ratio and water percentage; c: HBD-HBA ratio and temperature; d: HBD-HBA ratio and time; e: Liquid-solid ratio and water percentage; f: Liquid-solid ratio and temperature; g: Liquid-solid ratio and time; h: Water percentage and temperature; i: Water percentage and time; j: Temperature and time).



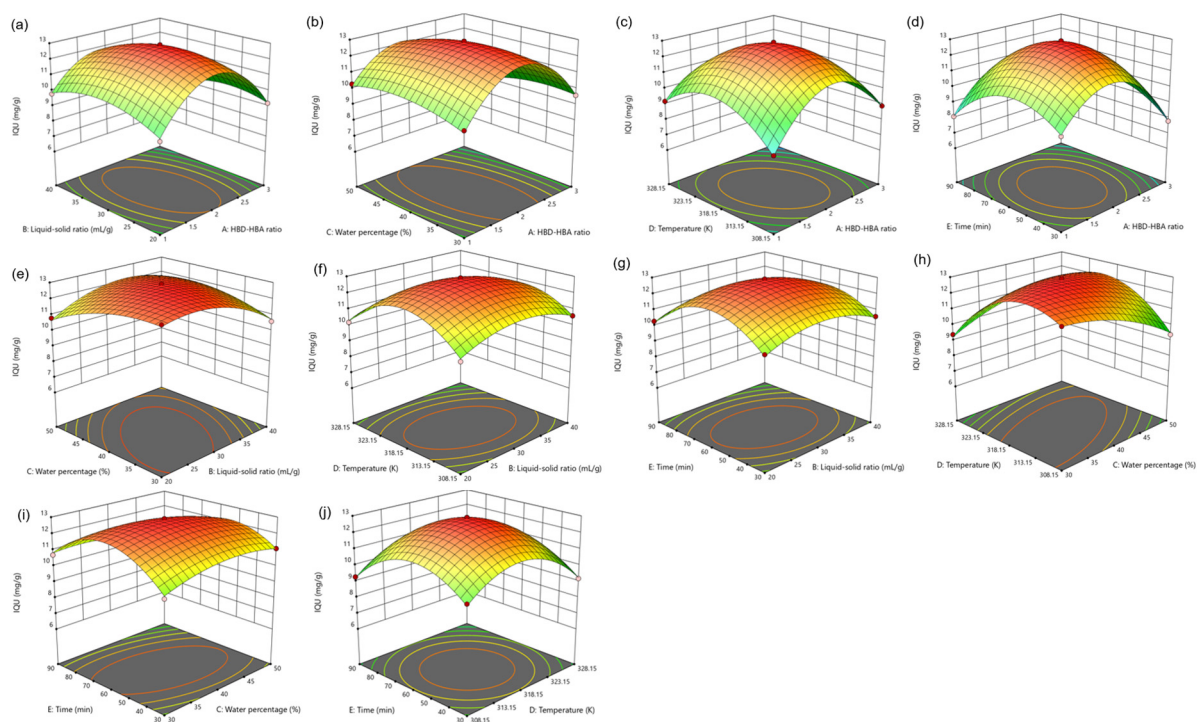

**Figure S10.** Response surface for the interactions of independent variables on IQU amount (a: HBD-HBA ratio and liquid-solid ratio; b: HBD-HBA ratio and water percentage; c: HBD-HBA ratio and temperature; d: HBD-HBA ratio and time; e: Liquid-solid ratio and water percentage; f: Liquid-solid ratio and temperature; g: Liquid-solid ratio and time; h: Water percentage and temperature; i: Water percentage and time; j: Temperature and time).

### 3. Repeatability test

**Table S3.** Repeatability of the extraction\*

| Amount<br>(mg/g) | Entry |       |       |       |       |       |       | Average<br>(mg/g) | RSD<br>(%)<br>(n=7) | RSD (%)<br>average |
|------------------|-------|-------|-------|-------|-------|-------|-------|-------------------|---------------------|--------------------|
|                  | 1     | 2     | 3     | 4     | 5     | 6     | 7     |                   |                     |                    |
| CGA              | 42.1  | 42.5  | 42.7  | 42.4  | 42.6  | 42.5  | 42.4  | 42.4              | 0.44                | 0.73               |
| GPA              | 137.1 | 137.1 | 136.2 | 136.1 | 136.8 | 136.8 | 136.8 | 136.7             | 0.40                |                    |
| AU               | 155.3 | 156.3 | 155.3 | 153.6 | 154.9 | 155.3 | 153.6 | 154.9             | 0.64                |                    |
| GP               | 5.2   | 5.2   | 5.3   | 5.3   | 5.2   | 5.1   | 5.2   | 5.2               | 1.32                |                    |
| RU               | 13.1  | 13.4  | 13.2  | 13.4  | 13.4  | 13.3  | 13.1  | 13.2              | 1.04                |                    |
| IQU              | 12.6  | 12.5  | 12.6  | 12.6  | 12.6  | 12.7  | 12.7  | 12.6              | 0.55                |                    |

\*Extraction conditions: HBD-HBA ratio of 1.96, liquid-solid ratio of 28.89 mL/g, water percentage of 38.44%, temperature of 317.15 K, and time of 55.60 min.

#### 4. HPLC chromatograms of standard components and EUL extract

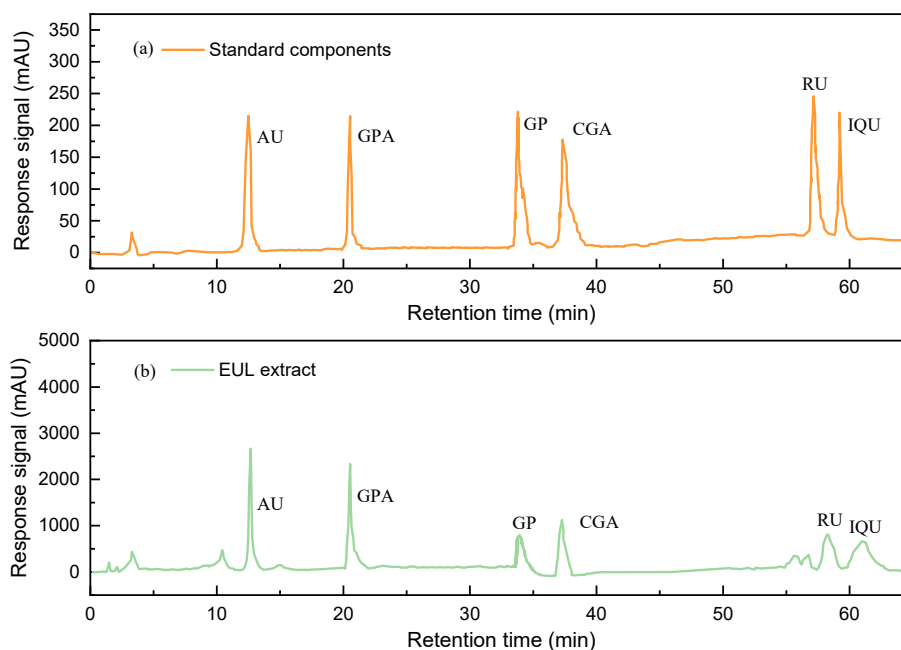

**Figure S11.** HPLC chromatograms of (a) standard components and (b) EUL extract.

Detection concentration: 1.0 mg/mL (standard components) and 10 mg/mL (EUL extract). Detection wavelength: 206 nm (AU), 238 nm (GPA and GP), 254 nm (RU and IQU), and 320 nm (CGA).

#### 5. Response surface optimization design of experiments

Five factors of DESs composition molar ratio, liquid-solid ratio (mL/g), water percentage (%), extraction temperature (K), and time (min) were employed as experimental reference factors, while extraction amount was served as the response value. The factor level coding table of Box-Behnken experimental design is shown in Table S4. The specific factor level design is shown in Table S5.

**Table S4.** Design factor levels and codes for extraction

| Name               | Units | Type     | Low    | High   |
|--------------------|-------|----------|--------|--------|
| HBD-HBA ratio      |       | Factor   | 1      | 3      |
| Liquid-solid ratio | mL/g  | Factor   | 20     | 40     |
| Water percentage   | %     | Factor   | 30     | 50     |
| Temperature        | K     | Factor   | 308.15 | 328.15 |
| Time               | min   | Factor   | 30     | 90     |
| CGA amount         | mg/g  | Response |        |        |
| GPA amount         | mg/g  | Response |        |        |
| AU amount          | mg/g  | Response |        |        |
| GP amount          | mg/g  | Response |        |        |

|            |      |          |
|------------|------|----------|
| RU amount  | mg/g | Response |
| IQU amount | mg/g | Response |
| Total      | mg/g | Response |

**Table S5.** The specific factor level design for iridoids, chlorogenic acid, and flavonoids extraction

| Std | Run | A: HBD-<br>HBA ratio | B: Liquid-<br>solid<br>ratio<br>(mL/g) | C: Water<br>percentage<br>(%) | D: Temperature<br>(k) | E: Time<br>(min) | Amount<br>(mg/g) |       |       |     |      |      |       |  |
|-----|-----|----------------------|----------------------------------------|-------------------------------|-----------------------|------------------|------------------|-------|-------|-----|------|------|-------|--|
|     |     |                      |                                        |                               |                       |                  | CGA              | GPA   | AU    | GP  | RU   | IQU  | Total |  |
| 28  | 1   | 3                    | 30                                     | 40                            | 328.15                | 60               | 13.2             | 87.2  | 91.8  | 2.7 | 8.9  | 6.8  | 210.6 |  |
| 9   | 2   | 2                    | 20                                     | 40                            | 318.15                | 30               | 23.8             | 115.8 | 135.6 | 4.4 | 11.8 | 10.6 | 302   |  |
| 6   | 3   | 2                    | 30                                     | 50                            | 308.15                | 60               | 19.7             | 105.1 | 129.6 | 3.8 | 11.3 | 9.4  | 278.9 |  |
| 20  | 4   | 2                    | 30                                     | 40                            | 328.15                | 90               | 15.2             | 101.4 | 120.3 | 3.5 | 10.8 | 8.6  | 259.8 |  |
| 37  | 5   | 2                    | 20                                     | 40                            | 308.15                | 60               | 24.8             | 117.1 | 135.6 | 4.2 | 11.8 | 10.2 | 303.7 |  |
| 13  | 6   | 1                    | 30                                     | 30                            | 318.15                | 60               | 23.8             | 106.4 | 108.3 | 3.7 | 9.6  | 9.9  | 261.7 |  |
| 23  | 7   | 2                    | 20                                     | 50                            | 318.15                | 60               | 27.8             | 118.3 | 126.3 | 4.3 | 11.8 | 10.8 | 299.3 |  |
| 36  | 8   | 3                    | 30                                     | 40                            | 318.15                | 90               | 14.6             | 90.2  | 94.2  | 3.3 | 8.4  | 7.9  | 218.6 |  |
| 22  | 9   | 2                    | 40                                     | 30                            | 318.15                | 60               | 30.8             | 114.8 | 127.1 | 4.3 | 10.6 | 10.6 | 298.2 |  |
| 38  | 10  | 2                    | 40                                     | 40                            | 308.15                | 60               | 22.8             | 102.8 | 123.9 | 3.9 | 11.8 | 10.6 | 275.8 |  |
| 46  | 11  | 2                    | 30                                     | 40                            | 318.15                | 60               | 44.3             | 140.2 | 155.2 | 5.5 | 13.2 | 12.8 | 371.2 |  |
| 35  | 12  | 1                    | 30                                     | 40                            | 318.15                | 90               | 13.8             | 86.9  | 93.8  | 3.2 | 9.2  | 8.1  | 215   |  |
| 25  | 13  | 1                    | 30                                     | 40                            | 308.15                | 60               | 15.9             | 92.3  | 102.2 | 3.6 | 10.8 | 8.4  | 233.2 |  |
| 45  | 14  | 2                    | 30                                     | 40                            | 318.15                | 60               | 43.6             | 135.2 | 156.7 | 5.8 | 13.5 | 12.9 | 367.7 |  |
| 2   | 15  | 3                    | 20                                     | 40                            | 318.15                | 60               | 22.8             | 99.6  | 99.3  | 3.5 | 9.2  | 9.2  | 243.6 |  |
| 34  | 16  | 3                    | 30                                     | 40                            | 318.15                | 30               | 16.9             | 93.8  | 96.8  | 3   | 8.9  | 7.8  | 227.2 |  |
| 3   | 17  | 1                    | 40                                     | 40                            | 318.15                | 60               | 26.8             | 95.4  | 101.1 | 3.5 | 9.6  | 9.8  | 246.2 |  |
| 8   | 18  | 2                    | 30                                     | 50                            | 328.15                | 60               | 25.3             | 118.7 | 137.2 | 4.3 | 12.1 | 11.1 | 308.7 |  |
| 41  | 19  | 2                    | 30                                     | 40                            | 318.15                | 60               | 43.8             | 135.4 | 154.6 | 5.4 | 13.3 | 12.8 | 365.3 |  |
| 40  | 20  | 2                    | 40                                     | 40                            | 328.15                | 60               | 24.4             | 107.2 | 121.8 | 3.5 | 10.2 | 9.5  | 276.6 |  |
| 17  | 21  | 2                    | 30                                     | 40                            | 308.15                | 30               | 20.8             | 112.9 | 134.8 | 4.4 | 12.3 | 10.1 | 295.3 |  |
| 10  | 22  | 2                    | 40                                     | 40                            | 318.15                | 30               | 24.5             | 114.1 | 129.3 | 4.2 | 11.6 | 10.6 | 294.3 |  |
| 31  | 23  | 2                    | 30                                     | 30                            | 318.15                | 90               | 25.6             | 116.3 | 138.1 | 4.3 | 11.2 | 10.7 | 306.2 |  |
| 12  | 24  | 2                    | 40                                     | 40                            | 318.15                | 90               | 20.8             | 94.1  | 116.2 | 3.6 | 9.8  | 9.6  | 254.1 |  |
| 44  | 25  | 2                    | 30                                     | 40                            | 318.15                | 60               | 41.6             | 135.9 | 155.8 | 5.5 | 13.5 | 12.7 | 365   |  |
| 21  | 26  | 2                    | 20                                     | 30                            | 318.15                | 60               | 26.5             | 125.2 | 147.2 | 4.5 | 12.3 | 12.5 | 328.2 |  |

|    |    |   |    |    |        |    |      |       |       |     |      |      |       |
|----|----|---|----|----|--------|----|------|-------|-------|-----|------|------|-------|
| 30 | 27 | 2 | 30 | 50 | 318.15 | 30 | 28.9 | 121.4 | 146.3 | 4.6 | 12.4 | 11.1 | 324.7 |
| 11 | 28 | 2 | 20 | 40 | 318.15 | 90 | 17.6 | 111.3 | 122.3 | 3.8 | 10.8 | 10.3 | 276.1 |
| 29 | 29 | 2 | 30 | 30 | 318.15 | 30 | 19.3 | 117.9 | 143.2 | 4.2 | 11.8 | 10.4 | 306.8 |
| 4  | 30 | 3 | 40 | 40 | 318.15 | 60 | 21.5 | 90.8  | 90.1  | 2.9 | 8.1  | 8.3  | 221.7 |
| 24 | 31 | 2 | 40 | 50 | 318.15 | 60 | 26.2 | 111.5 | 136.8 | 3.8 | 10.6 | 11.6 | 300.5 |
| 43 | 32 | 2 | 30 | 40 | 318.15 | 60 | 41.8 | 134.8 | 154.1 | 5.2 | 13.1 | 12.9 | 361.9 |
| 14 | 33 | 3 | 30 | 30 | 318.15 | 60 | 22.8 | 105.9 | 115.2 | 3.7 | 9.8  | 9.6  | 267   |
| 16 | 34 | 3 | 30 | 50 | 318.15 | 60 | 20.4 | 95.2  | 93.6  | 3.1 | 8.4  | 8.4  | 229.1 |
| 27 | 35 | 1 | 30 | 40 | 328.15 | 60 | 21.6 | 101.9 | 106.3 | 3.2 | 9.6  | 9.2  | 251.8 |
| 26 | 36 | 3 | 30 | 40 | 308.15 | 60 | 22.1 | 98.3  | 99.7  | 3.5 | 9.1  | 8.9  | 241.6 |
| 19 | 37 | 2 | 30 | 40 | 308.15 | 90 | 15.3 | 99.9  | 123.3 | 3.7 | 10.8 | 9.3  | 262.3 |
| 1  | 38 | 1 | 20 | 40 | 318.15 | 60 | 19.6 | 103.2 | 105.1 | 3.5 | 9.7  | 9.3  | 250.4 |
| 33 | 39 | 1 | 30 | 40 | 318.15 | 30 | 21.6 | 107.3 | 117.6 | 3.8 | 10.2 | 9.4  | 269.9 |
| 42 | 40 | 2 | 30 | 40 | 318.15 | 60 | 43.5 | 135.3 | 155.7 | 5.3 | 13.8 | 12.9 | 366.5 |
| 15 | 41 | 1 | 30 | 50 | 318.15 | 60 | 21.6 | 106.2 | 116.2 | 3.9 | 10.8 | 10.3 | 269   |
| 32 | 42 | 2 | 30 | 50 | 318.15 | 90 | 13.1 | 102   | 125.8 | 3.8 | 10.6 | 9.6  | 264.9 |
| 7  | 43 | 2 | 30 | 30 | 328.15 | 60 | 19.8 | 108.3 | 133.8 | 3.5 | 10.9 | 9.4  | 285.7 |
| 18 | 44 | 2 | 30 | 40 | 328.15 | 30 | 16.5 | 111.3 | 133.1 | 4.1 | 11.6 | 9.2  | 285.8 |
| 39 | 45 | 2 | 20 | 40 | 328.15 | 60 | 19.8 | 111.6 | 128.1 | 3.8 | 11.3 | 10.2 | 284.8 |
| 5  | 46 | 2 | 30 | 30 | 308.15 | 60 | 27.8 | 126.3 | 146.8 | 4.8 | 13.1 | 12.1 | 330.9 |

---
